# Supplementary material for: Symmetry driven: the synthesis of co-substituent octasilsesquioxanes
Source: Royal Society of Chemistry journal article supplement (doi:10.1039/d1nj02381k), 2021-01-01
Supplement: d1nj02381k1.pdf [file d1nj02381k1.pdf]

# Electronic Supplementary Information (ESI)

## Symmetry driving: Synthesis of co-substituents octasilsesquioxane

Nicha Prigyai,<sup>a</sup> Supphachok Chanmungkalakul,<sup>a</sup> Mongkol Sukwattanasinitt,<sup>b,c</sup> and Vuthichai Ervithayasuporn<sup>\*a</sup>

<sup>a</sup> Department of Chemistry, Center of Excellence for Innovation in Chemistry (PERCH-CIC), and Center for Inorganic and Materials Chemistry, Faculty of Science, Mahidol University, Rama VI road, Ratchathewi, Bangkok 10400, Thailand.

<sup>b</sup> Department of Chemistry, Faculty of Science, Chulalongkorn University, Bangkok, 10330 Thailand.

<sup>c</sup> Nanotec-CU Center of Excellence on Food and Agriculture, Department of Chemistry, Faculty of Science, Chulalongkorn University, Bangkok, 10330 Thailand.

\*Corresponding author: Vuthichai Ervithayasuporn (V.E.)

E-mail address: [vuthichai.erv@mahidol.edu](mailto:vuthichai.erv@mahidol.edu)

[maldiniandg@hotmail.com](mailto:maldiniandg@hotmail.com)

# Electronic Supplementary Information (ESI)

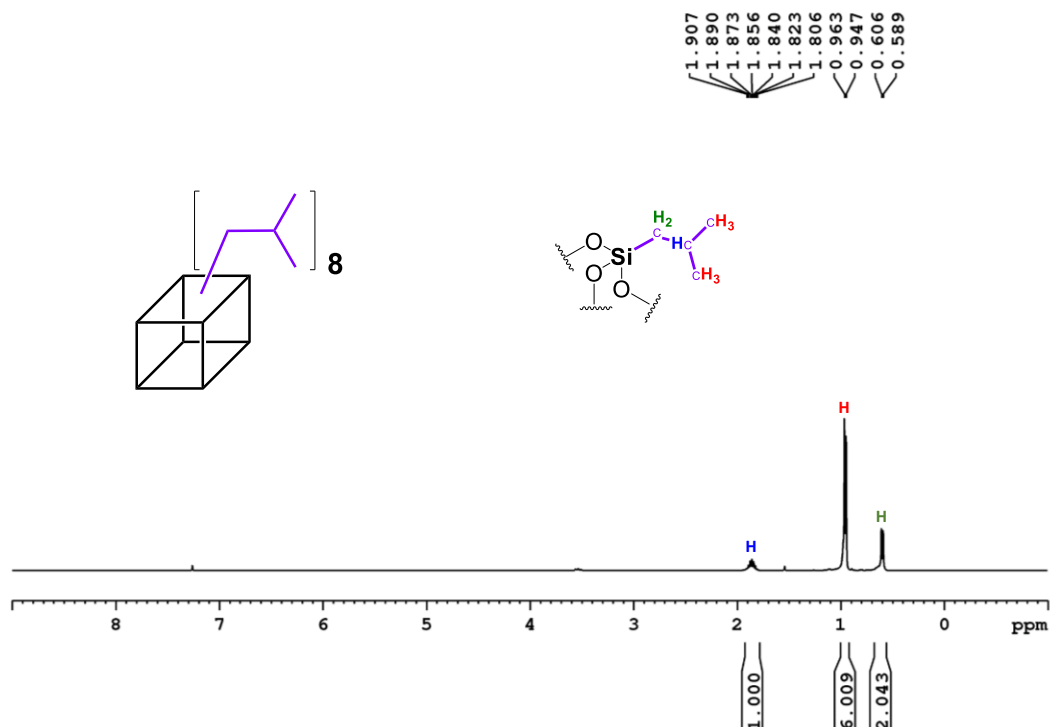

Figure S1 <sup>1</sup>H NMR spectrum of *i*-butyl T<sub>8</sub> in CDCl<sub>3</sub>.

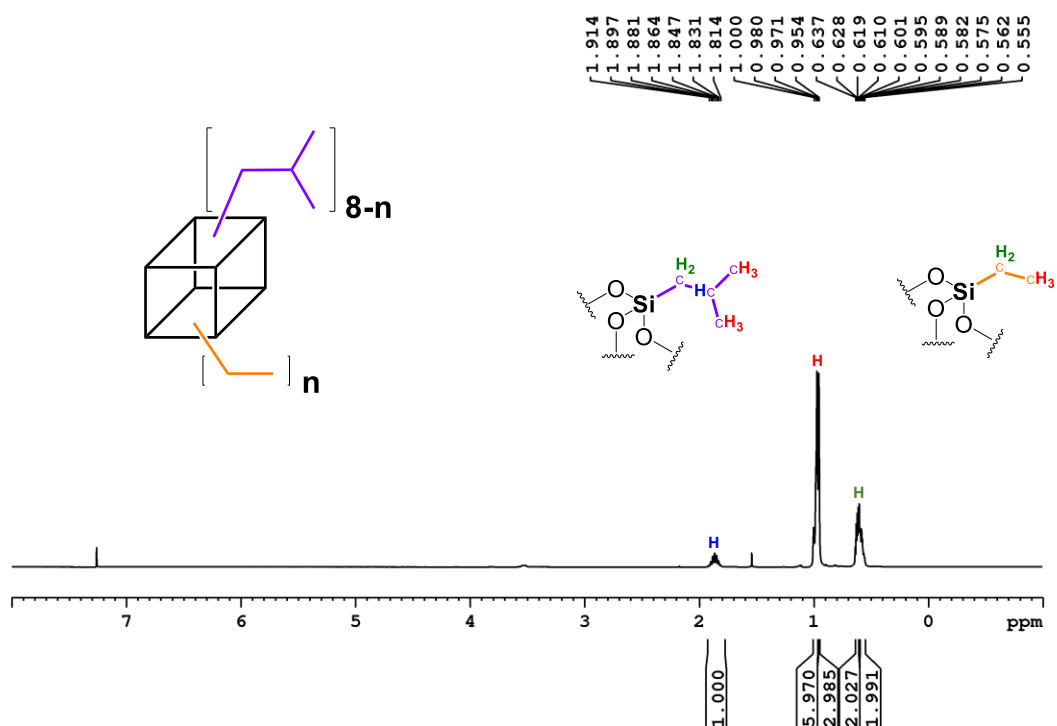

Figure S2 <sup>1</sup>H NMR spectrum of *i*-butyl-ethyl T<sub>8</sub> in CDCl<sub>3</sub>.

# Electronic Supplementary Information (ESI)

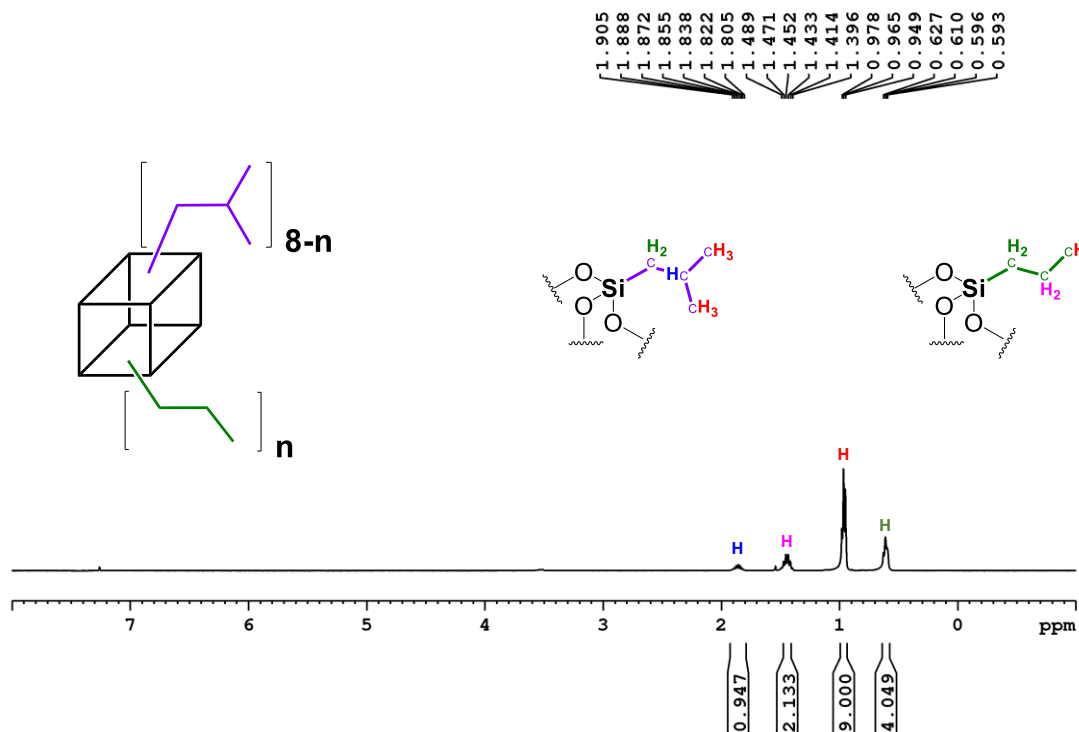

Figure S3  $^1\text{H}$  NMR spectrum of *i*-butyl-propyl  $\text{T}_8$  in  $\text{CDCl}_3$ .

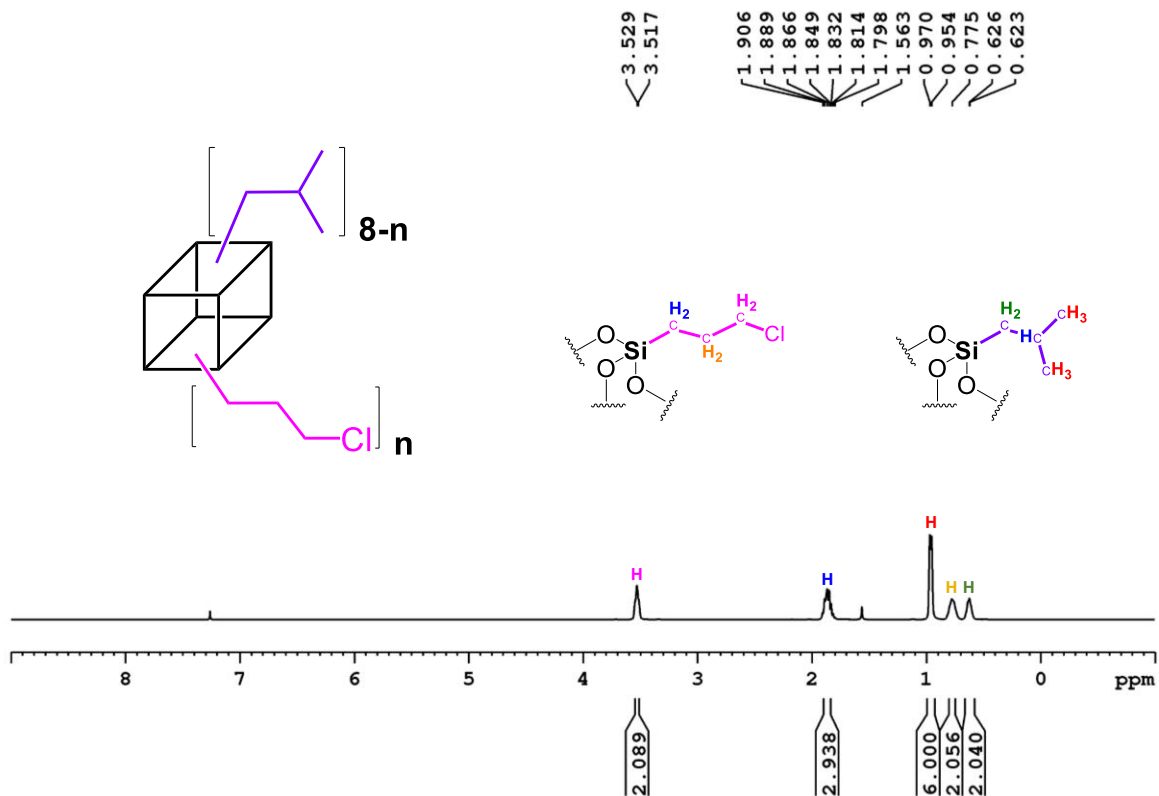

Figure S4  $^1\text{H}$  NMR spectrum of *i*-butyl-propyl chloride  $\text{T}_8$  in  $\text{CDCl}_3$ .

# Electronic Supplementary Information (ESI)

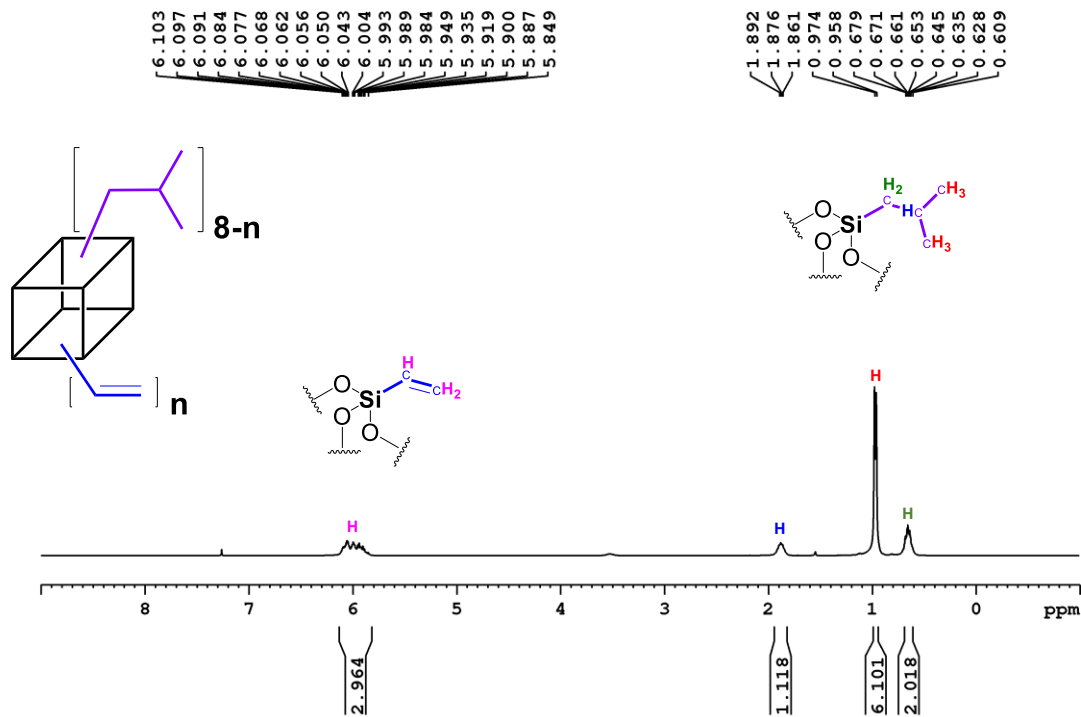

Figure S5  $^1\text{H}$  NMR spectrum of *i*-butyl-vinyl  $\text{T}_8$  in  $\text{CDCl}_3$ .

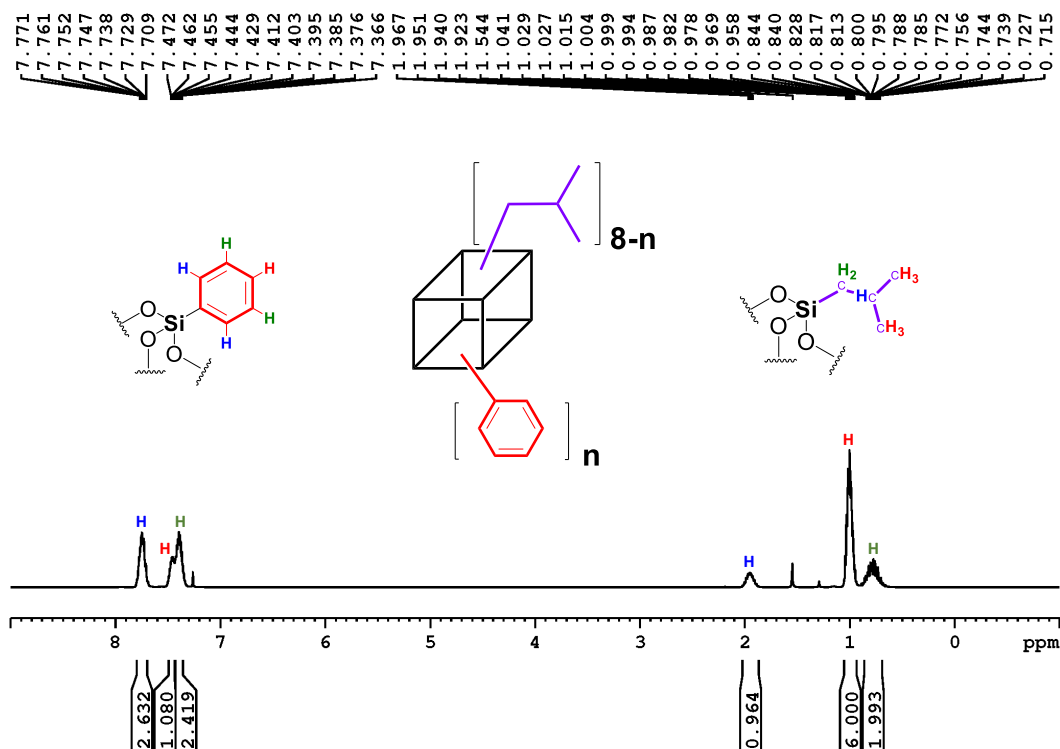

Figure S6  $^1\text{H}$  NMR spectra of *i*-butyl-phenyl  $\text{T}_8$  in  $\text{CDCl}_3$ .

# Electronic Supplementary Information (ESI)

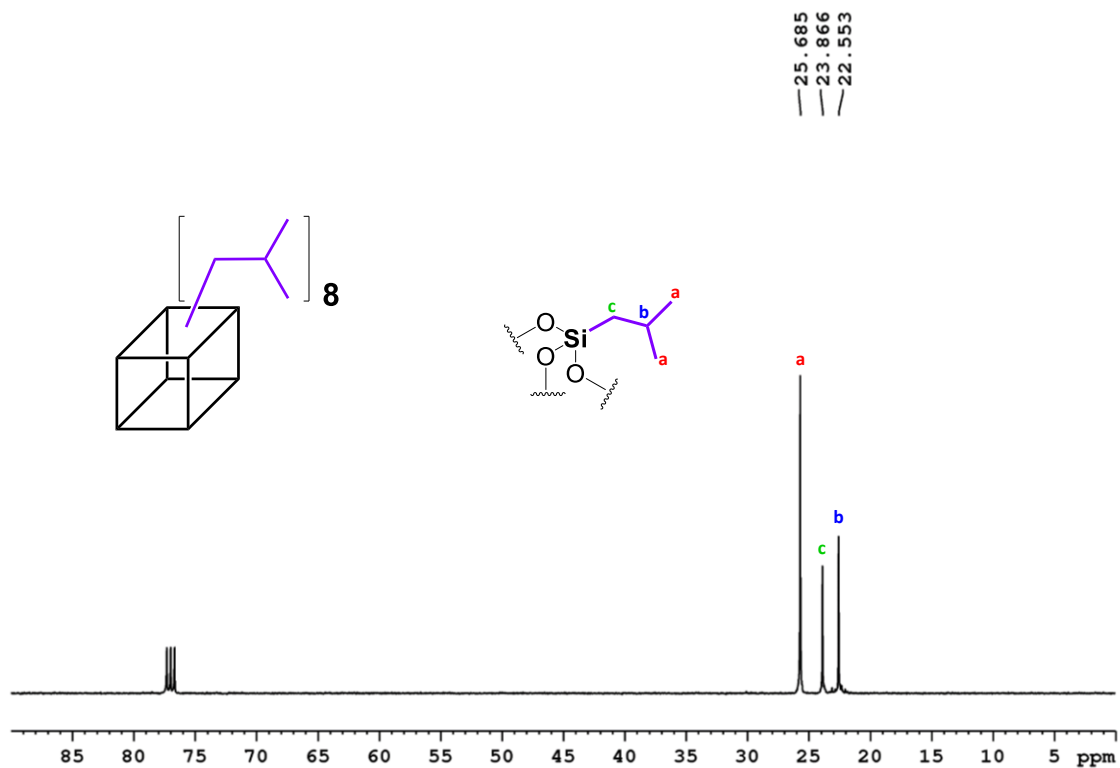

Figure S7 <sup>13</sup>C NMR spectrum of *i*-butyl T<sub>8</sub> in CDCl<sub>3</sub>.

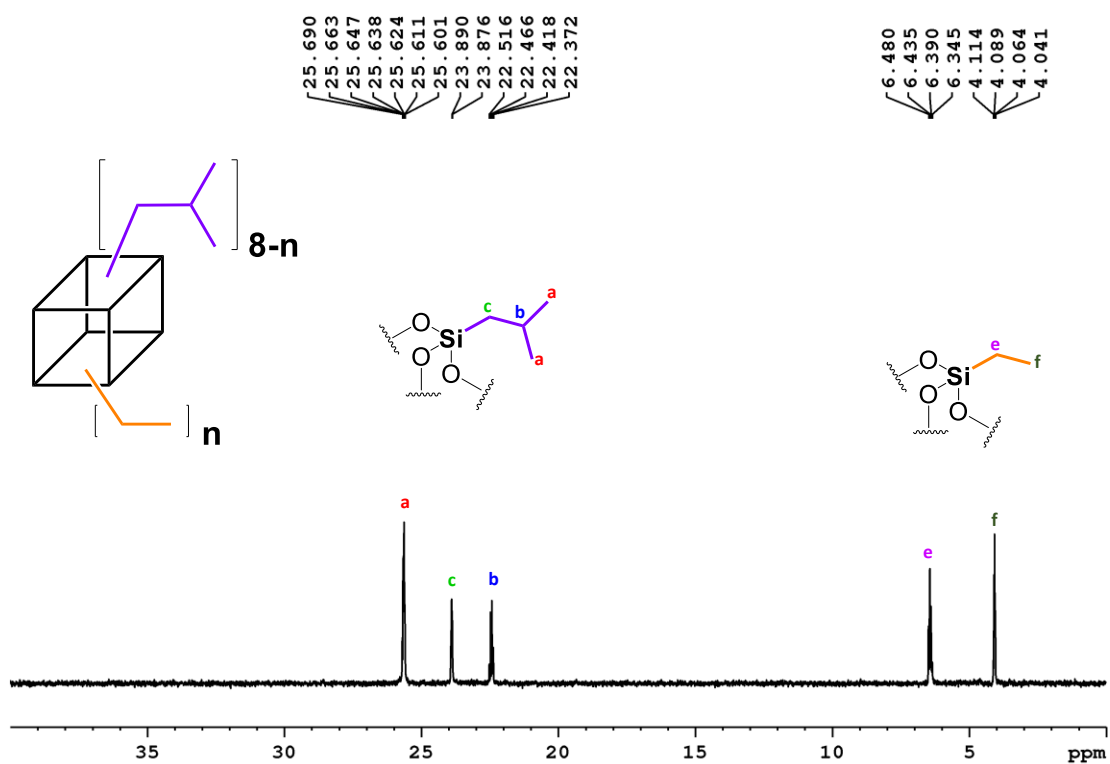

Figure S8 <sup>13</sup>C NMR spectrum of *i*-butyl-ethyl T<sub>8</sub> in CDCl<sub>3</sub>.

# Electronic Supplementary Information (ESI)

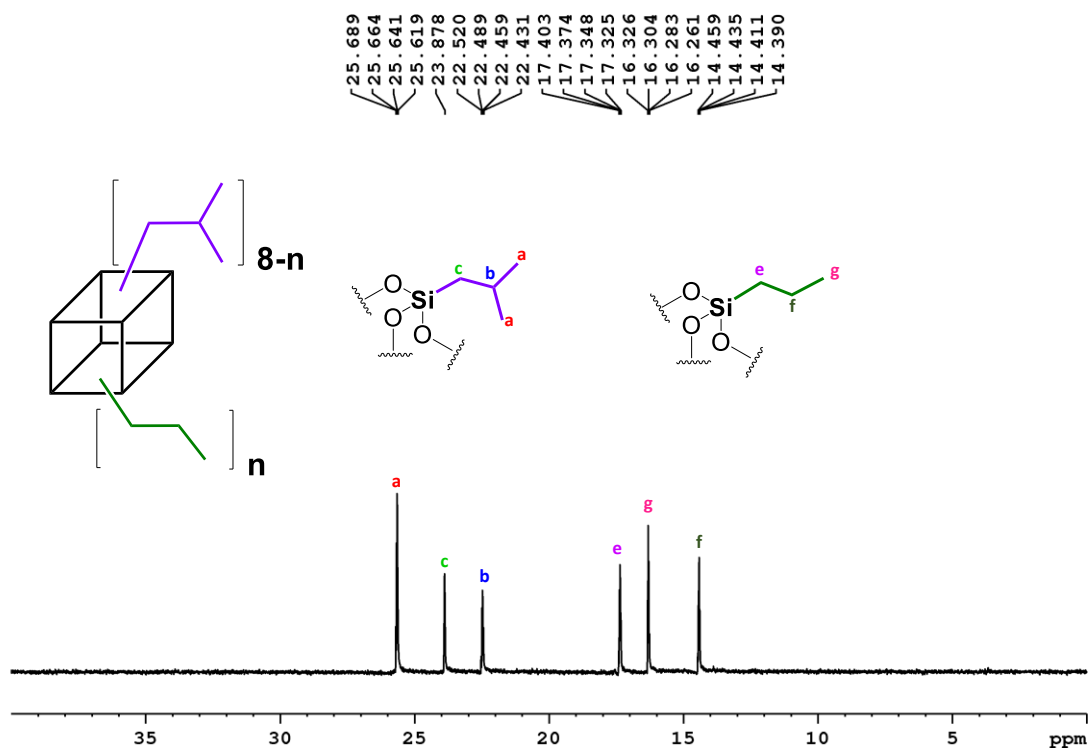

Figure S9  $^{13}\text{C}$  NMR spectrum of *i*-butyl-propyl  $\text{T}_8$  in  $\text{CDCl}_3$ .

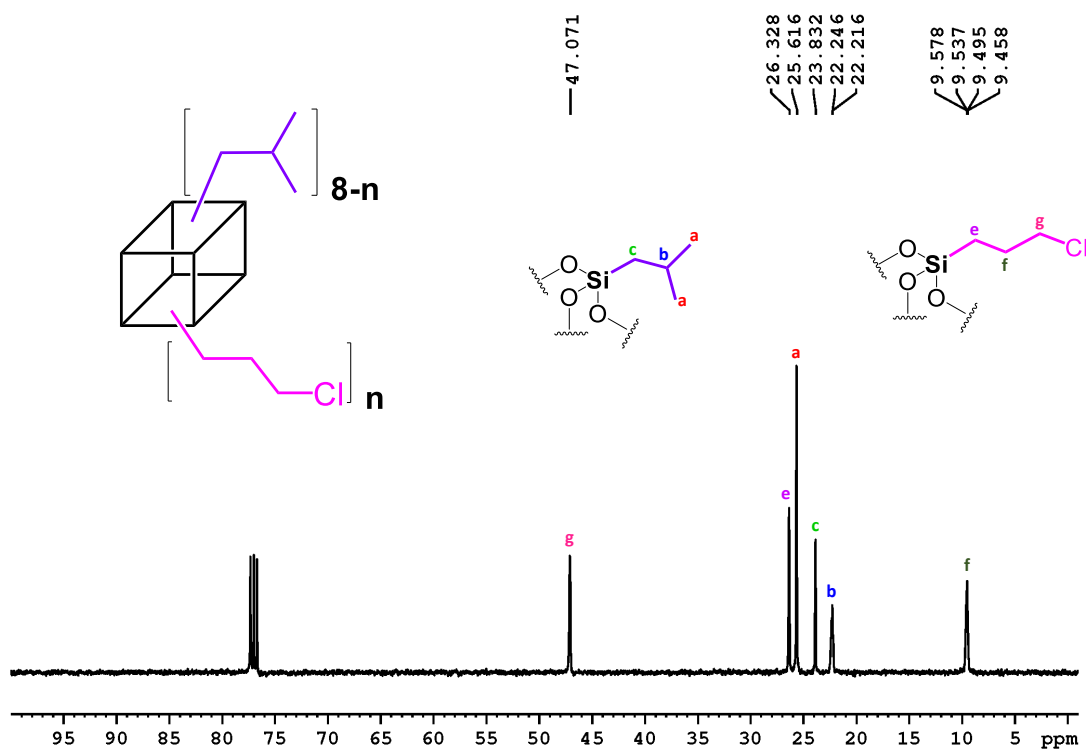

Figure S10  $^{13}\text{C}$  NMR spectrum of *i*-butyl-propyl chloride  $\text{T}_8$  in  $\text{CDCl}_3$ .

# Electronic Supplementary Information (ESI)

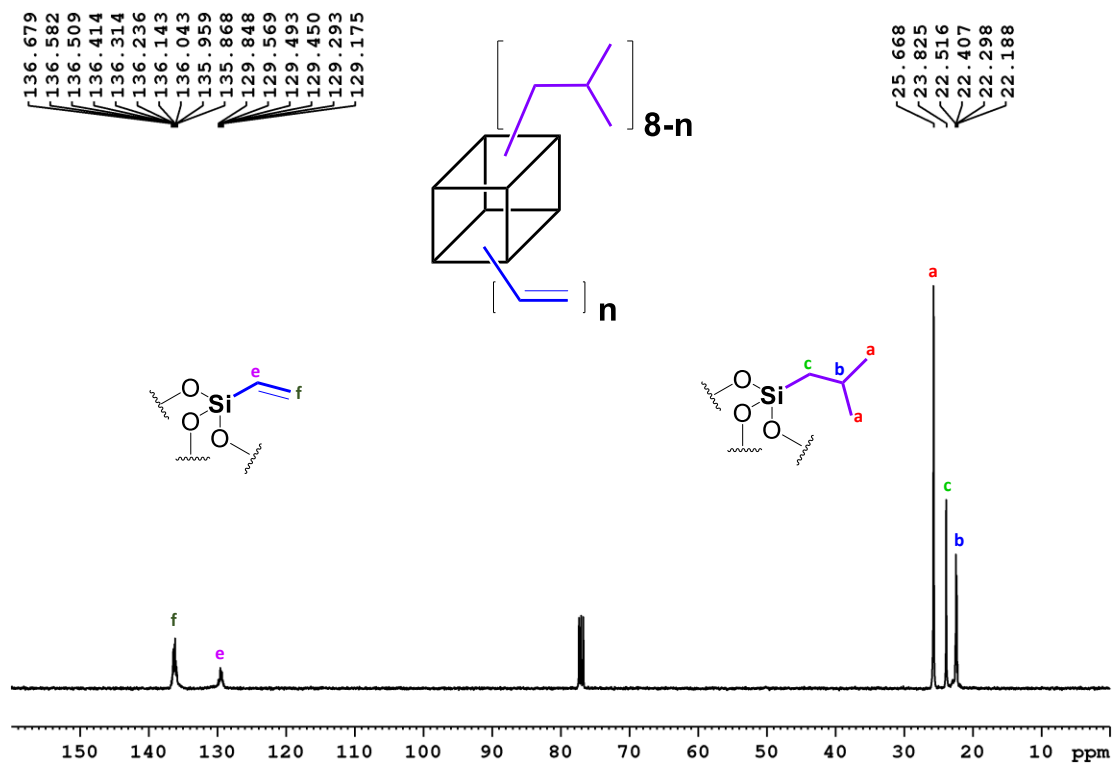

Figure S11 <sup>13</sup>C NMR spectrum of *i*-butyl-vinyl T<sub>8</sub> in CDCl<sub>3</sub>.

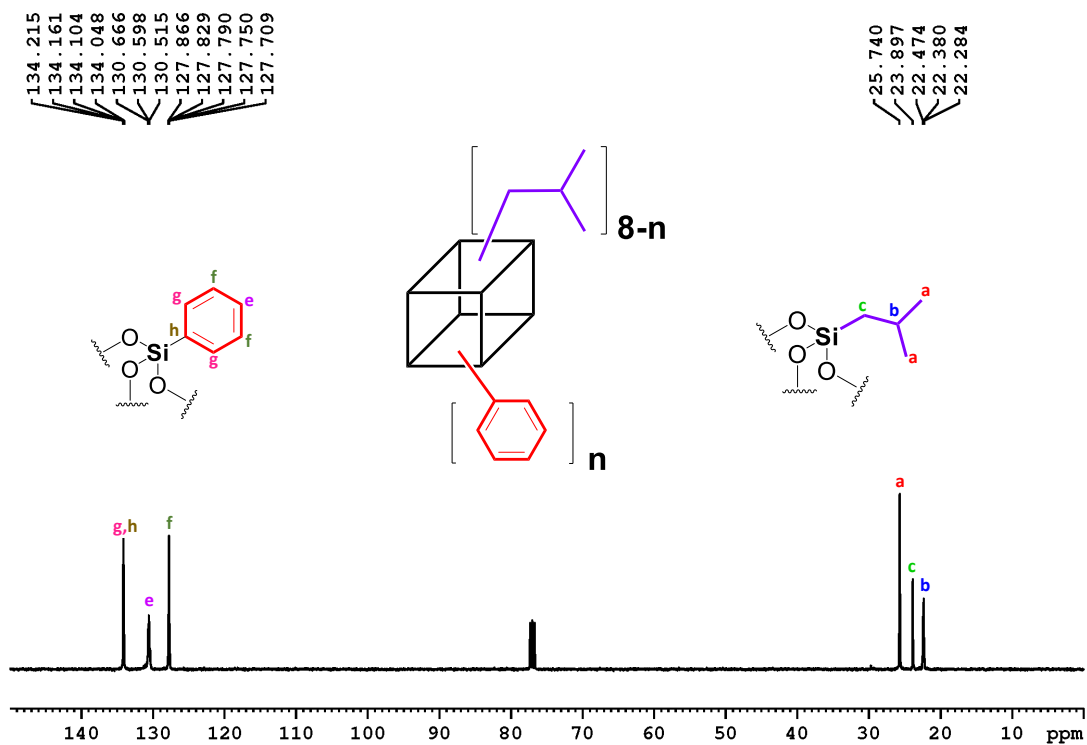

Figure S12 <sup>13</sup>C NMR spectrum of *i*-butyl-phenyl T<sub>8</sub> in CDCl<sub>3</sub>.

# Electronic Supplementary Information (ESI)

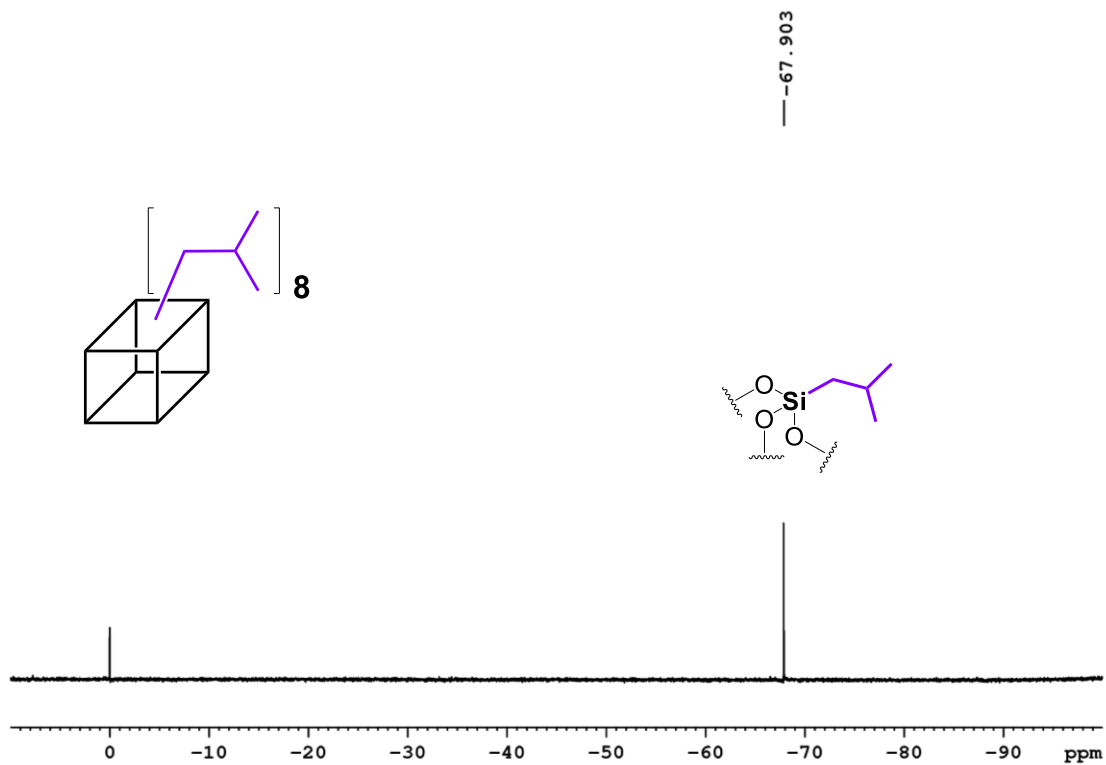

Figure S13 <sup>29</sup>Si NMR spectrum of *i*-butyl T<sub>8</sub> in CDCl<sub>3</sub>.

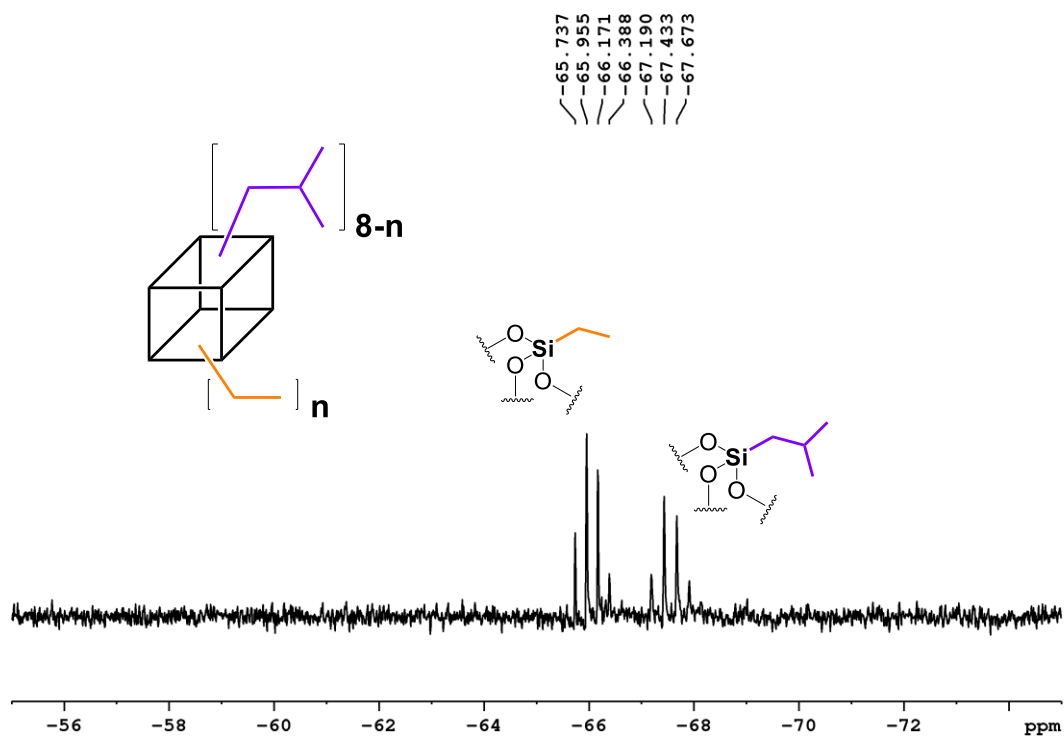

Figure S14 <sup>29</sup>Si NMR spectrum of *i*-butyl-ethyl T<sub>8</sub> in CDCl<sub>3</sub>.



# Electronic Supplementary Information (ESI)

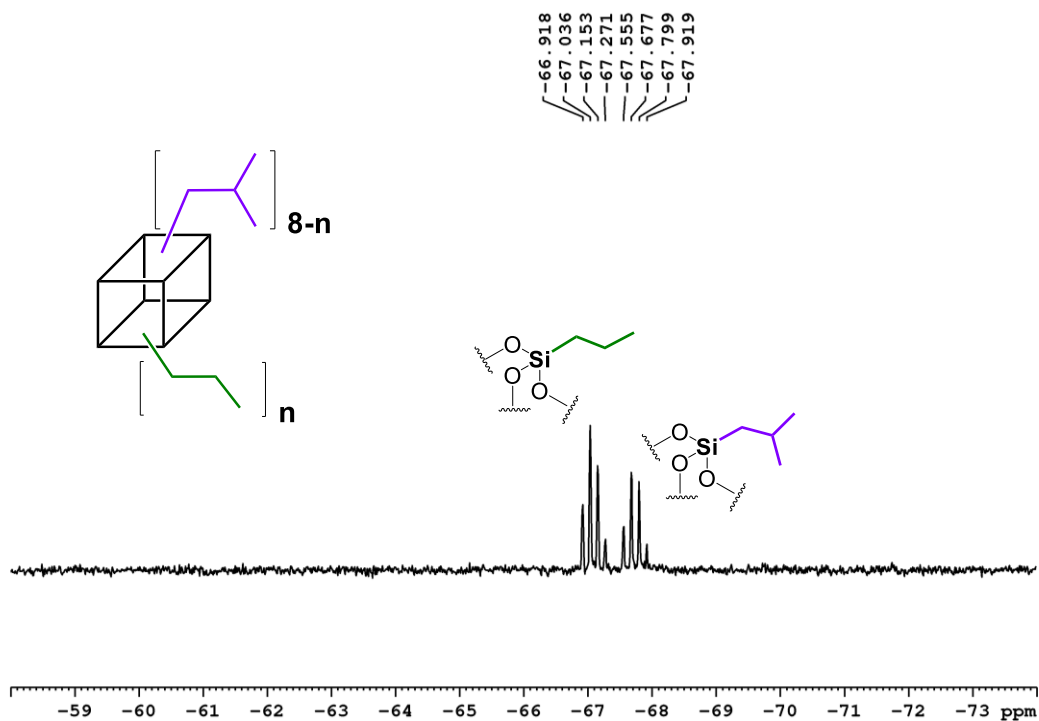

Figure S15  $^{29}\text{Si}$  NMR spectrum of *i*-butyl-propyl  $\text{T}_8$  in  $\text{CDCl}_3$ .

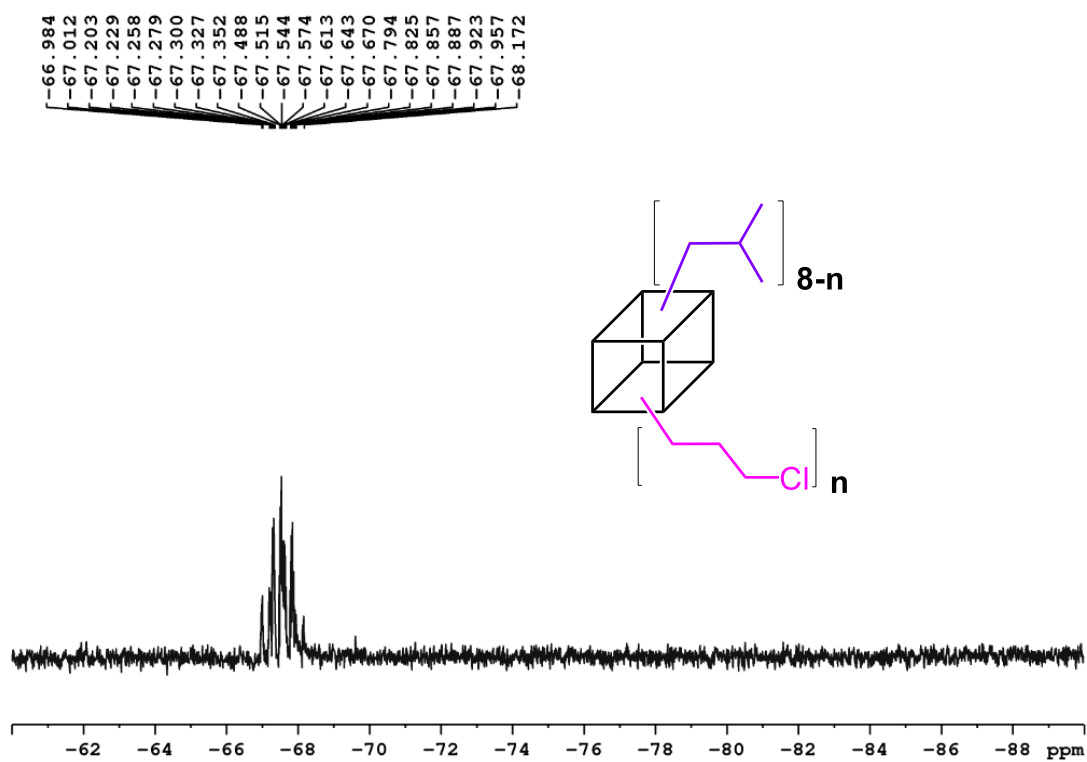

Figure S16  $^{29}\text{Si}$  NMR spectrum of *i*-butyl-propyl chloride  $\text{T}_8$  in  $\text{CDCl}_3$ .

# Electronic Supplementary Information (ESI)

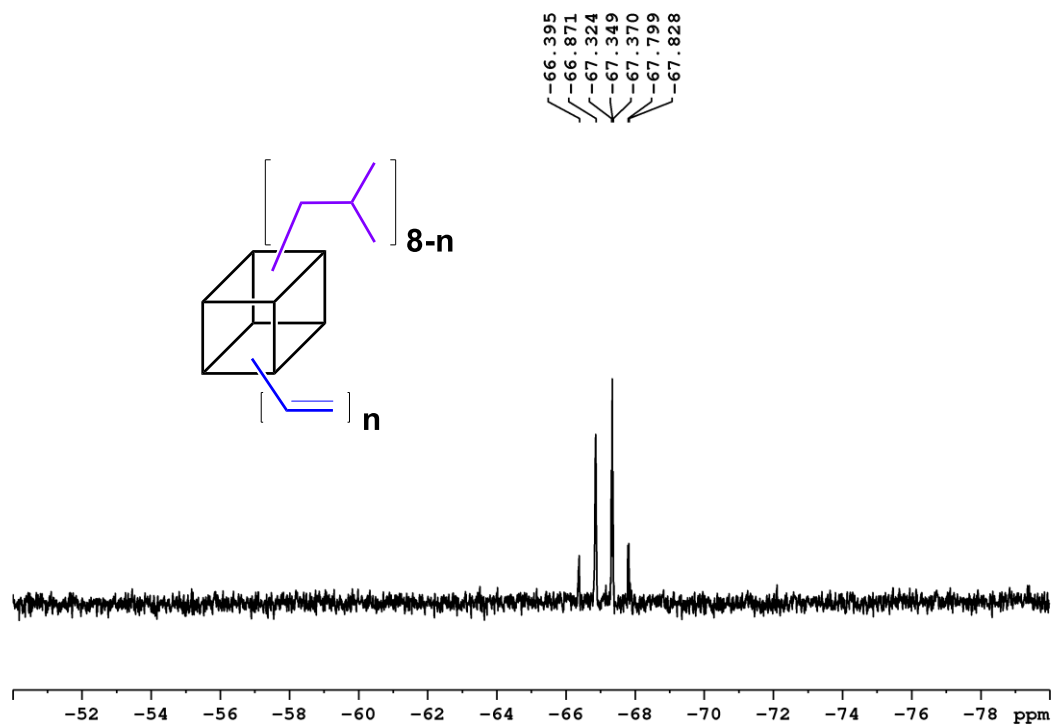

Figure S17 <sup>29</sup>Si NMR spectrum of *i*-butyl-vinyl T<sub>8</sub> in CDCl<sub>3</sub>.

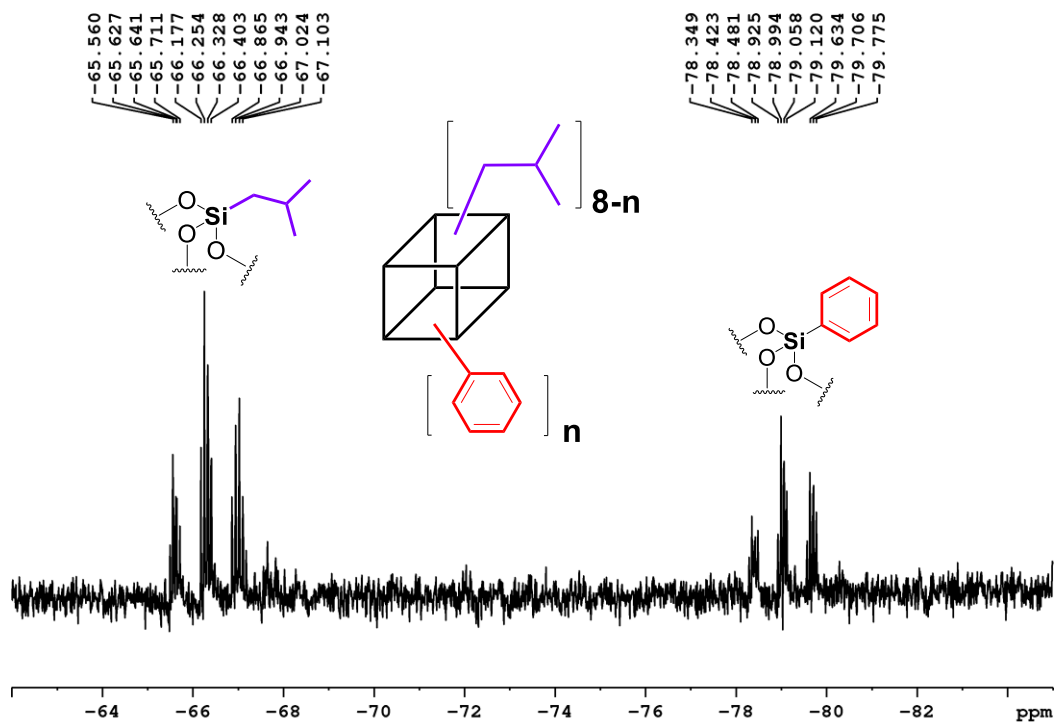

Figure S18 <sup>29</sup>Si NMR spectrum of *i*-butyl-phenyl T<sub>8</sub> in CDCl<sub>3</sub>.

# Electronic Supplementary Information (ESI)

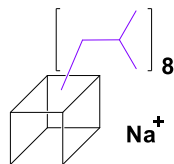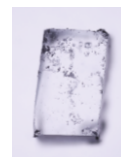

Calcd:  $m/z$  895.3070  
Found :  $m/z$  895.3072

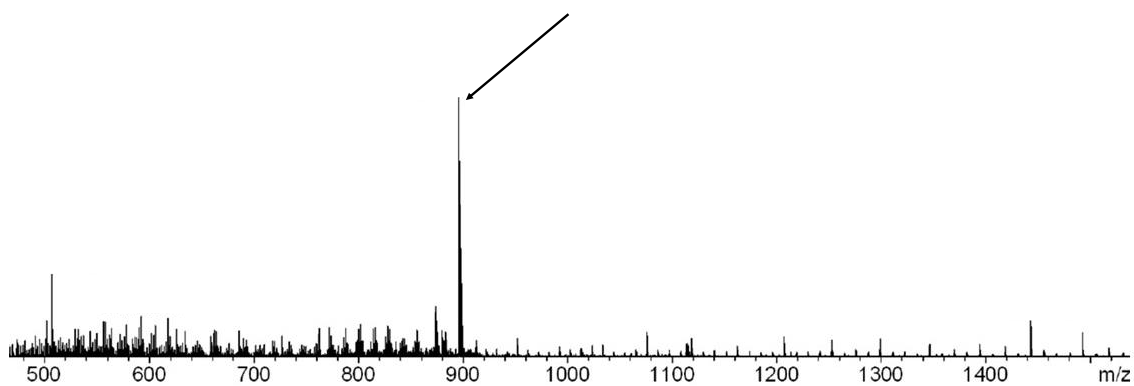

| #  | $m/z$     | I     | I %   | S/N   | Res.  |
|----|-----------|-------|-------|-------|-------|
| 1  | 129.7569  | 3050  | 14.6  | 16.4  | 15725 |
| 2  | 144.9565  | 2829  | 13.6  | 15.2  | 15030 |
| 3  | 160.9967  | 2630  | 12.6  | 14.3  | 17666 |
| 4  | 233.5693  | 2630  | 12.6  | 15.4  | 22763 |
| 5  | 296.8383  | 4447  | 21.3  | 28.0  | 24163 |
| 6  | 296.9355  | 3059  | 14.6  | 19.2  | 19042 |
| 7  | 413.2676  | 6285  | 30.1  | 35.7  | 5001  |
| 8  | 419.0935  | 3217  | 15.4  | 17.8  | 30305 |
| 9  | 441.2977  | 3613  | 17.3  | 19.2  | 5005  |
| 10 | 507.3114  | 6868  | 32.9  | 32.9  | 4565  |
| 11 | 555.5093  | 3078  | 14.7  | 13.6  | 6041  |
| 12 | 557.5137  | 3051  | 14.6  | 13.5  | 4791  |
| 13 | 577.4819  | 2829  | 13.6  | 12.5  | 4320  |
| 14 | 591.4947  | 3499  | 16.8  | 15.8  | 5058  |
| 15 | 605.4999  | 2779  | 13.3  | 12.4  | 4833  |
| 16 | 617.5219  | 3311  | 15.9  | 15.0  | 5378  |
| 17 | 801.6871  | 2873  | 13.8  | 13.9  | 5046  |
| 18 | 827.7073  | 2715  | 13.0  | 13.3  | 5156  |
| 19 | 873.3322  | 3843  | 18.4  | 19.7  | 4951  |
| 20 | 874.3275  | 3124  | 15.0  | 15.8  | 5662  |
| 21 | 895.3072  | 20880 | 100.0 | 113.9 | 5299  |
| 22 | 896.3086  | 15829 | 75.8  | 86.1  | 5122  |
| 23 | 897.3086  | 12315 | 59.0  | 66.7  | 5352  |
| 24 | 898.3069  | 6106  | 29.2  | 32.5  | 5157  |
| 25 | 899.3106  | 2739  | 13.1  | 13.9  | 5220  |
| 26 | 1442.8367 | 3183  | 15.2  | 24.2  | 48906 |
| 27 | 1443.0690 | 2717  | 13.0  | 20.5  | 40664 |
| 28 | 2094.7278 | 2932  | 14.0  | 20.1  | 68883 |
| 29 | 2338.9265 | 5201  | 24.9  | 35.6  | 71446 |
| 30 | 2937.6458 | 3077  | 14.7  | 22.1  | 78011 |

**Figure S19** ESI-MS spectrum of *i*-butyl T<sub>8</sub>.

# Electronic Supplementary Information (ESI)

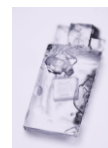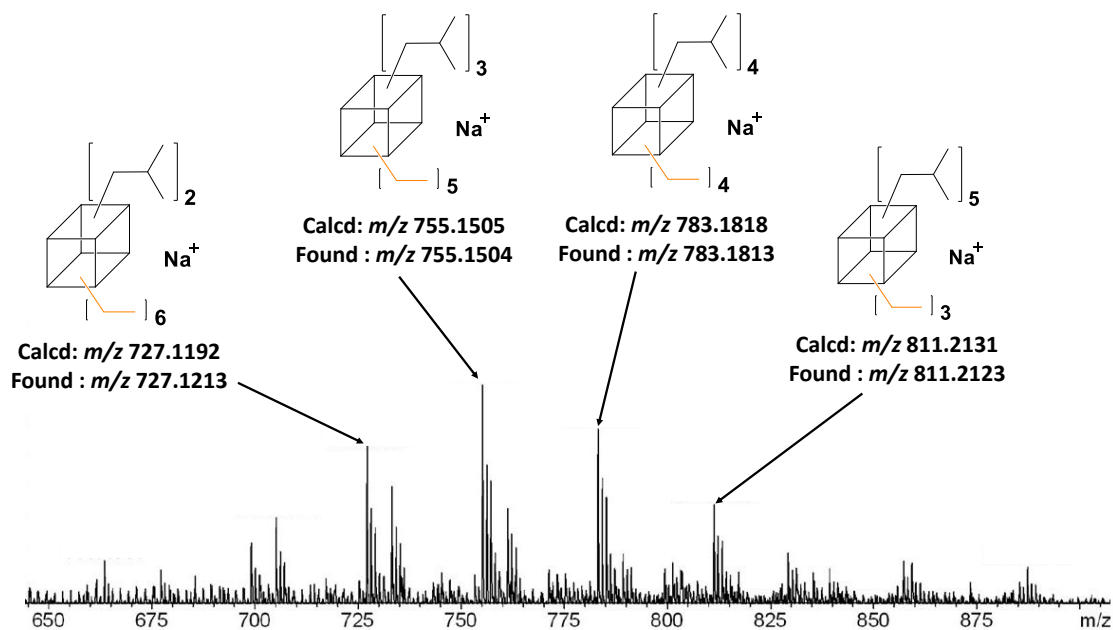

| #  | m/z      | I    | I%    | S/N  | Res.  |
|----|----------|------|-------|------|-------|
| 1  | 145.0153 | 1543 | 21.7  | 25.3 | 14454 |
| 2  | 413.2648 | 5224 | 73.5  | 78.6 | 4848  |
| 3  | 441.2936 | 2746 | 38.6  | 37.0 | 4734  |
| 4  | 497.3645 | 1549 | 21.8  | 16.9 | 2699  |
| 5  | 699.0924 | 2110 | 29.7  | 16.5 | 4205  |
| 6  | 705.1394 | 2942 | 41.4  | 23.9 | 4830  |
| 7  | 706.1394 | 1873 | 26.3  | 14.3 | 5278  |
| 8  | 727.1213 | 5099 | 71.7  | 42.3 | 4758  |
| 9  | 728.1202 | 3234 | 45.5  | 25.9 | 5104  |
| 10 | 729.1221 | 2626 | 36.9  | 20.5 | 4463  |
| 11 | 733.1709 | 3916 | 55.1  | 31.7 | 4942  |
| 12 | 734.1664 | 2644 | 37.2  | 20.6 | 5494  |
| 13 | 735.1696 | 2063 | 29.0  | 15.5 | 4629  |
| 14 | 755.1504 | 7111 | 100.0 | 61.5 | 5051  |
| 15 | 756.1489 | 4575 | 64.3  | 38.7 | 5163  |
| 16 | 757.1509 | 4109 | 57.8  | 34.6 | 4810  |
| 17 | 758.1512 | 1738 | 24.4  | 13.1 | 4161  |
| 18 | 761.1985 | 3230 | 45.4  | 26.8 | 4790  |
| 19 | 762.1948 | 2438 | 34.3  | 19.6 | 5224  |
| 20 | 763.1978 | 2004 | 28.2  | 15.7 | 4861  |
| 21 | 783.1813 | 5730 | 80.6  | 51.6 | 5060  |
| 22 | 784.1801 | 4189 | 58.9  | 37.1 | 5464  |
| 23 | 785.1813 | 3496 | 49.2  | 30.6 | 4538  |
| 24 | 786.1866 | 1803 | 25.4  | 14.5 | 4767  |
| 25 | 789.2265 | 1806 | 25.4  | 14.6 | 4517  |
| 26 | 811.2123 | 3364 | 47.3  | 30.8 | 5230  |
| 27 | 812.2098 | 2366 | 33.3  | 20.9 | 5671  |
| 28 | 813.2131 | 2211 | 31.1  | 19.4 | 4804  |
| 29 | 829.2281 | 1838 | 25.9  | 16.3 | 4630  |
| 30 | 857.2553 | 1587 | 22.3  | 14.6 | 4978  |

Figure S20 ESI-MS spectrum of *i*-butyl-ethyl T<sub>8</sub>.

# Electronic Supplementary Information (ESI)

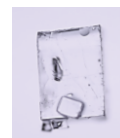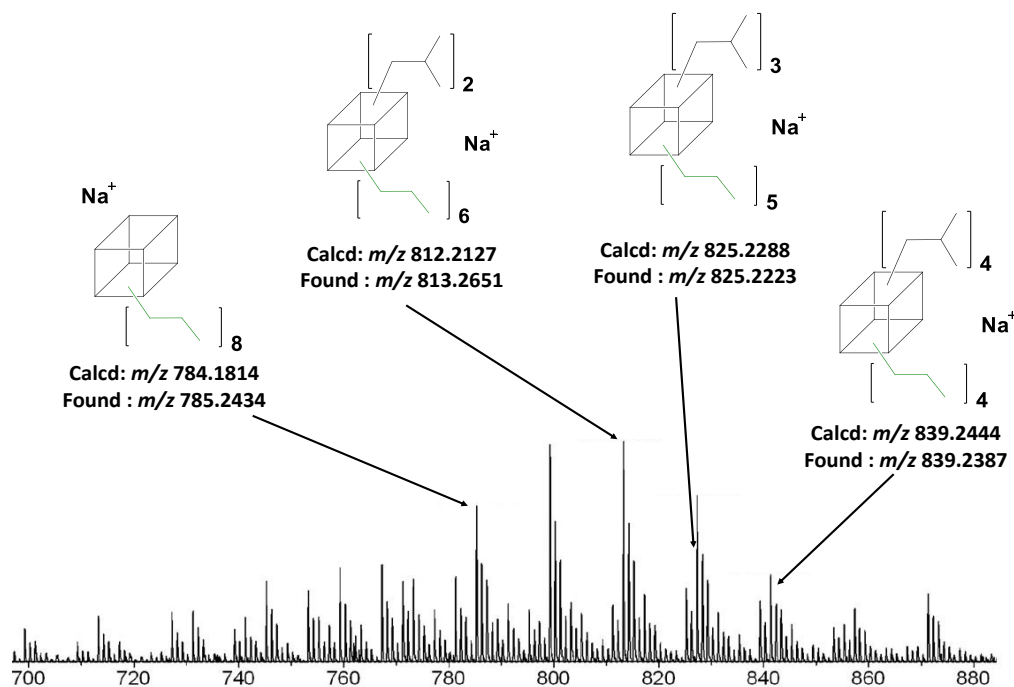

| #  | $m/z$    | I     | I %   | S/N   | Res. |
|----|----------|-------|-------|-------|------|
| 1  | 745.2524 | 5965  | 37.7  | 35.6  | 4945 |
| 2  | 753.2203 | 5241  | 33.2  | 31.3  | 5366 |
| 3  | 759.2628 | 6893  | 43.6  | 42.1  | 4880 |
| 4  | 760.2670 | 4249  | 26.9  | 25.2  | 5110 |
| 5  | 767.2350 | 7109  | 45.0  | 43.8  | 5059 |
| 6  | 768.2358 | 4533  | 28.7  | 27.3  | 5238 |
| 7  | 771.2328 | 5932  | 37.5  | 36.4  | 4984 |
| 8  | 773.2662 | 6095  | 38.6  | 37.5  | 4664 |
| 9  | 781.2512 | 6248  | 39.5  | 38.9  | 5206 |
| 10 | 785.2434 | 11275 | 71.4  | 72.0  | 5305 |
| 11 | 786.2422 | 7184  | 45.5  | 45.2  | 5339 |
| 12 | 787.2578 | 5884  | 37.2  | 36.7  | 4401 |
| 13 | 791.2753 | 4331  | 27.4  | 26.6  | 4585 |
| 14 | 799.2538 | 15569 | 98.5  | 101.8 | 5239 |
| 15 | 800.2557 | 10125 | 64.1  | 65.6  | 5316 |
| 16 | 801.2579 | 7440  | 47.1  | 47.7  | 4893 |
| 17 | 803.2439 | 4319  | 27.3  | 26.9  | 4770 |
| 18 | 813.2651 | 15801 | 100.0 | 105.0 | 4810 |
| 19 | 814.2664 | 10032 | 63.5  | 66.0  | 4818 |
| 20 | 815.2666 | 7398  | 46.8  | 48.2  | 4752 |
| 21 | 817.2533 | 4592  | 29.1  | 29.2  | 4879 |
| 22 | 825.2223 | 5335  | 33.8  | 34.6  | 5176 |
| 23 | 827.2733 | 11963 | 75.7  | 80.4  | 4719 |
| 24 | 828.2774 | 7810  | 49.4  | 51.8  | 4931 |
| 25 | 829.2768 | 6019  | 38.1  | 39.5  | 4658 |
| 26 | 839.2387 | 4549  | 28.8  | 29.8  | 5308 |
| 27 | 841.2767 | 6408  | 40.6  | 42.8  | 4259 |
| 28 | 842.2815 | 4333  | 27.4  | 28.4  | 4479 |
| 29 | 871.2657 | 5039  | 31.9  | 34.6  | 5268 |
| 30 | 885.2805 | 5236  | 33.1  | 36.7  | 5134 |

Figure S21 ESI-MS spectrum of *i*-butyl-propyl T<sub>8</sub>.

# Electronic Supplementary Information (ESI)

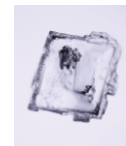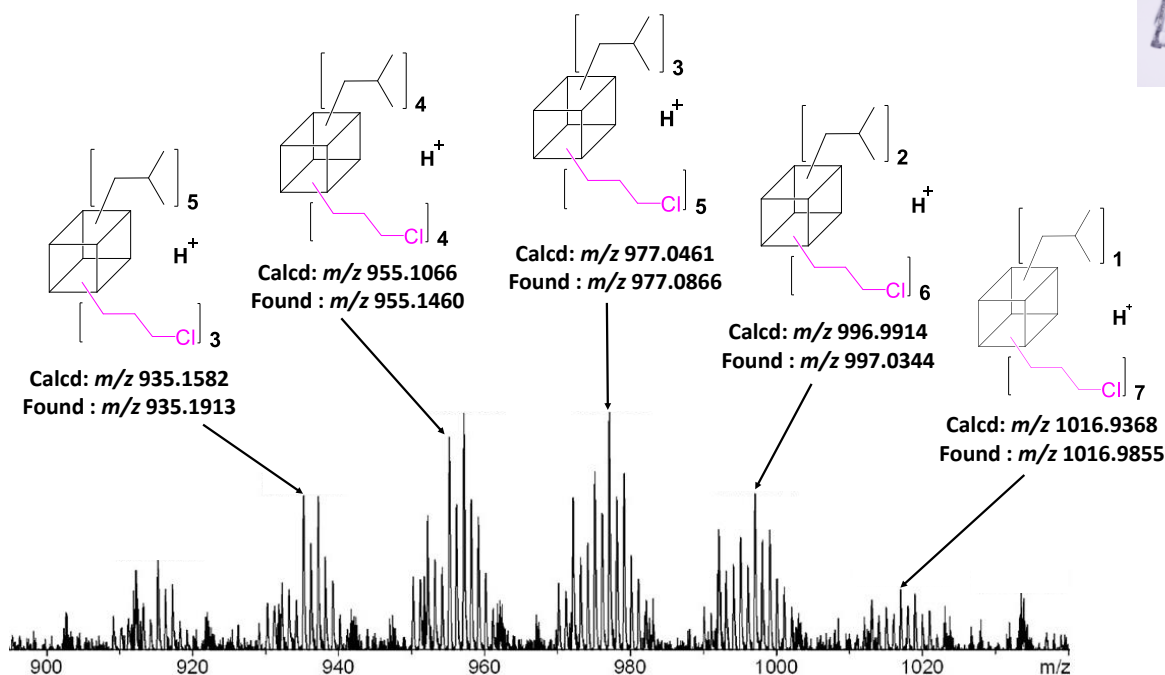

| #  | $m/z$     | I     | I %   | S/N  | Res.  |
|----|-----------|-------|-------|------|-------|
| 1  | 101.8815  | 3887  | 28.4  | 8.7  | 13995 |
| 2  | 129.7528  | 4658  | 34.0  | 10.5 | 16631 |
| 3  | 144.9590  | 4398  | 32.1  | 9.9  | 15956 |
| 4  | 195.5969  | 4224  | 30.8  | 9.8  | 20664 |
| 5  | 233.5678  | 4171  | 30.4  | 9.8  | 22868 |
| 6  | 296.8296  | 4567  | 33.3  | 11.2 | 21732 |
| 7  | 413.2635  | 13700 | 100.0 | 35.0 | 4402  |
| 8  | 532.0511  | 4170  | 30.4  | 10.2 | 35177 |
| 9  | 813.2830  | 5252  | 38.3  | 13.2 | 4911  |
| 10 | 935.1913  | 4823  | 35.2  | 11.2 | 4824  |
| 11 | 937.1920  | 4785  | 34.9  | 11.1 | 4800  |
| 12 | 952.1738  | 4246  | 31.0  | 9.9  | 6069  |
| 13 | 955.1460  | 6520  | 47.6  | 15.8 | 4769  |
| 14 | 956.1416  | 4556  | 33.3  | 10.8 | 4863  |
| 15 | 957.1419  | 7209  | 52.6  | 17.6 | 4494  |
| 16 | 958.1342  | 4693  | 34.3  | 11.1 | 4907  |
| 17 | 959.1329  | 4170  | 30.4  | 9.8  | 4639  |
| 18 | 972.1197  | 4746  | 34.6  | 11.5 | 5528  |
| 19 | 975.1076  | 5523  | 40.3  | 13.5 | 4738  |
| 20 | 976.1033  | 4299  | 31.4  | 10.3 | 4905  |
| 21 | 977.0866  | 7259  | 53.0  | 18.1 | 4635  |
| 22 | 978.0879  | 4784  | 34.9  | 11.6 | 4633  |
| 23 | 979.0830  | 5466  | 39.9  | 13.5 | 5282  |
| 24 | 997.0344  | 4879  | 35.6  | 12.2 | 4846  |
| 25 | 1442.8431 | 5032  | 36.7  | 14.8 | 52413 |
| 26 | 1863.9752 | 4206  | 30.7  | 11.9 | 60434 |
| 27 | 2035.7613 | 3859  | 28.2  | 10.3 | 64150 |
| 28 | 2338.9364 | 6212  | 45.3  | 16.2 | 70231 |
| 29 | 2339.1438 | 3885  | 28.4  | 10.0 | 37566 |
| 30 | 2937.6371 | 3853  | 28.1  | 9.6  | 78331 |

Figure S22 ESI-MS spectrum of *i*-butyl-propyl chloride T<sub>8</sub>.

# Electronic Supplementary Information (ESI)

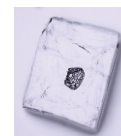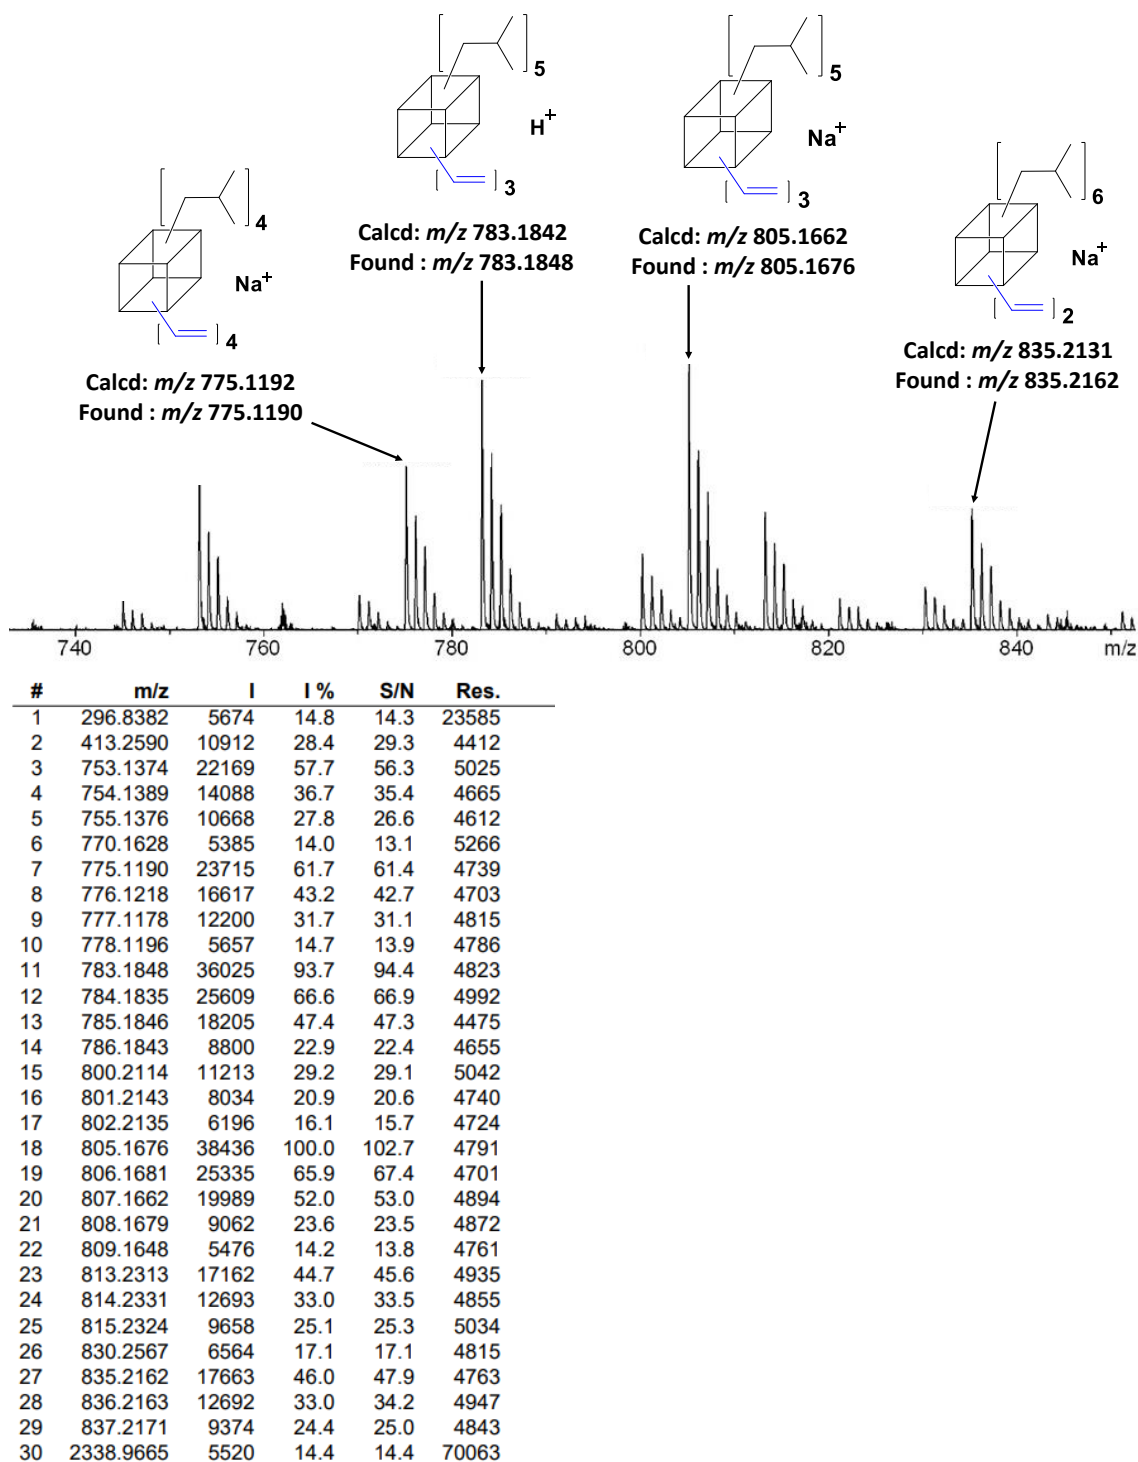

Figure S23 ESI-MS spectrum of *i*-butyl-vinyl T<sub>8</sub>.

# Electronic Supplementary Information (ESI)

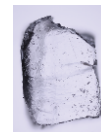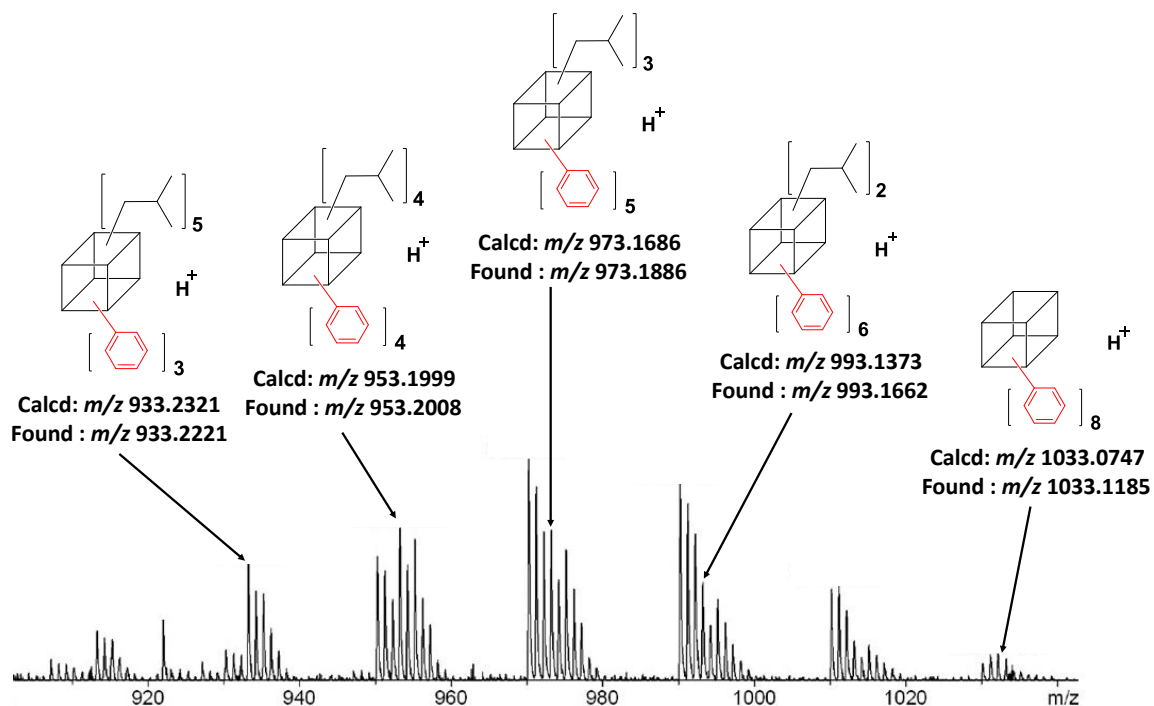

| #  | m/z       | I    | I %   | S/N  | Res. |
|----|-----------|------|-------|------|------|
| 1  | 413.2620  | 688  | 32.7  | 49.9 | 4146 |
| 2  | 875.1498  | 571  | 27.2  | 23.4 | 4685 |
| 3  | 922.0004  | 594  | 28.3  | 22.2 | 5516 |
| 4  | 933.2221  | 1131 | 53.8  | 43.1 | 5278 |
| 5  | 934.2261  | 872  | 41.5  | 32.9 | 5124 |
| 6  | 935.2198  | 843  | 40.1  | 31.8 | 4833 |
| 7  | 950.2470  | 1197 | 56.9  | 47.4 | 5025 |
| 8  | 951.2481  | 1058 | 50.3  | 41.8 | 5041 |
| 9  | 952.2387  | 793  | 37.7  | 30.9 | 4947 |
| 10 | 953.2008  | 1457 | 69.3  | 58.6 | 4451 |
| 11 | 954.2005  | 1112 | 52.9  | 44.3 | 4704 |
| 12 | 955.1965  | 1353 | 64.4  | 54.5 | 5413 |
| 13 | 956.1956  | 805  | 38.3  | 31.6 | 5143 |
| 14 | 970.2131  | 2102 | 100.0 | 88.7 | 5014 |
| 15 | 971.2119  | 1845 | 87.8  | 77.7 | 4956 |
| 16 | 972.2087  | 1423 | 67.7  | 59.6 | 4838 |
| 17 | 973.1886  | 1441 | 68.6  | 60.5 | 4576 |
| 18 | 974.1695  | 978  | 46.5  | 40.5 | 4772 |
| 19 | 975.1651  | 1257 | 59.8  | 52.8 | 5182 |
| 20 | 976.1722  | 896  | 42.6  | 37.1 | 5558 |
| 21 | 977.1627  | 568  | 27.0  | 22.8 | 5260 |
| 22 | 990.1813  | 1878 | 89.3  | 82.7 | 5235 |
| 23 | 991.1833  | 1692 | 80.5  | 74.5 | 4880 |
| 24 | 992.1842  | 1335 | 63.5  | 58.5 | 4597 |
| 25 | 993.1662  | 950  | 45.2  | 41.1 | 4391 |
| 26 | 995.1471  | 793  | 37.7  | 34.1 | 4751 |
| 27 | 996.1438  | 580  | 27.6  | 24.4 | 5122 |
| 28 | 1010.1555 | 887  | 42.2  | 39.9 | 5619 |
| 29 | 1011.1489 | 923  | 43.9  | 41.7 | 4900 |
| 30 | 1012.1470 | 687  | 32.7  | 30.6 | 5024 |

Figure S24 ESI-MS spectrum of *i*-butyl-phenyl Ts.



# Electronic Supplementary Information (ESI)

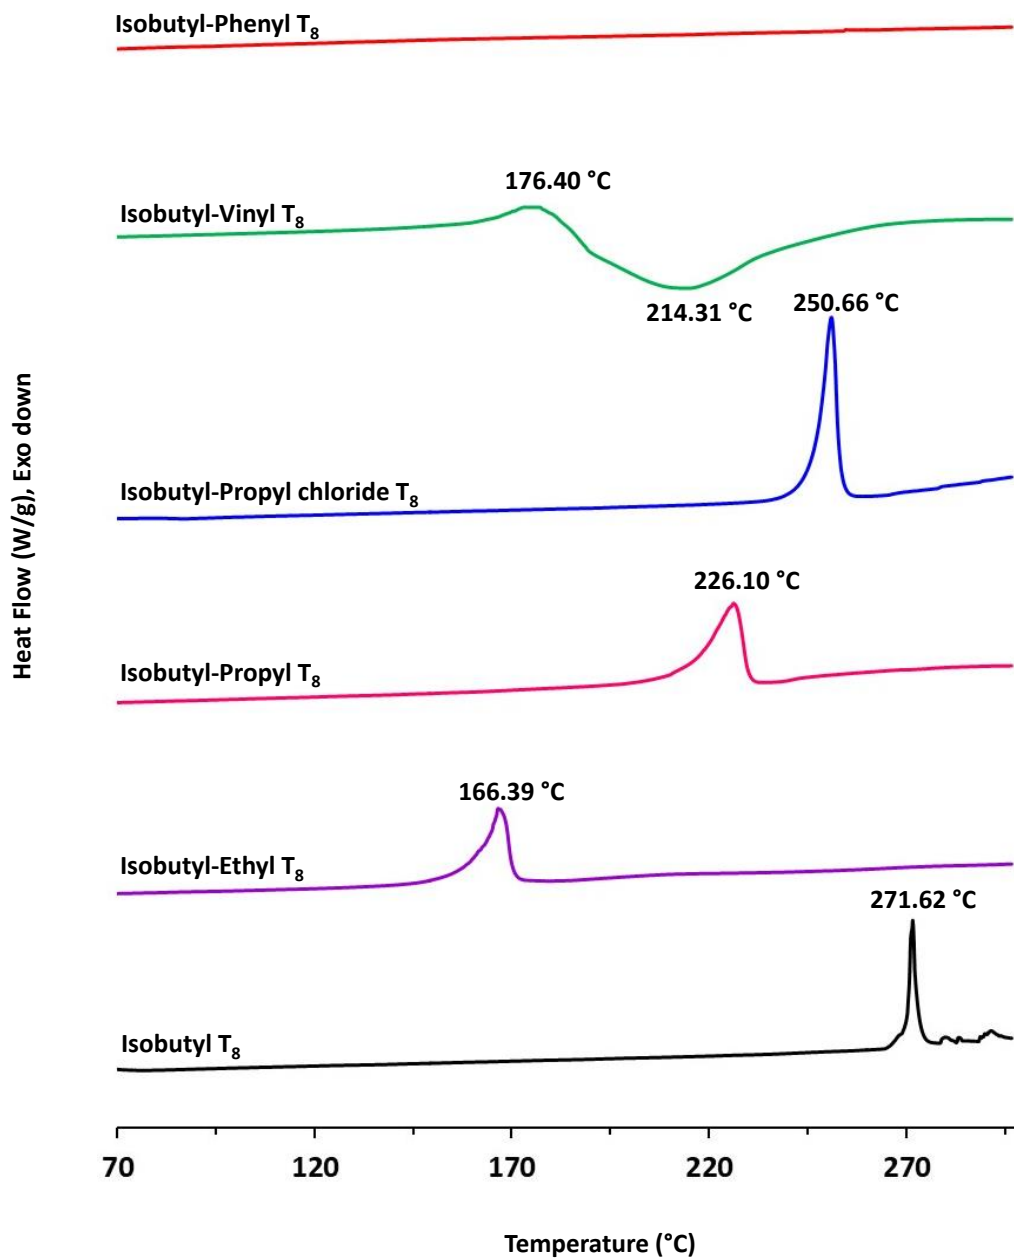

**Figure S25** DSC heating thermograms of *i*-butyl T<sub>8</sub> and mixed-substituent T<sub>8</sub>.

# Electronic Supplementary Information (ESI)

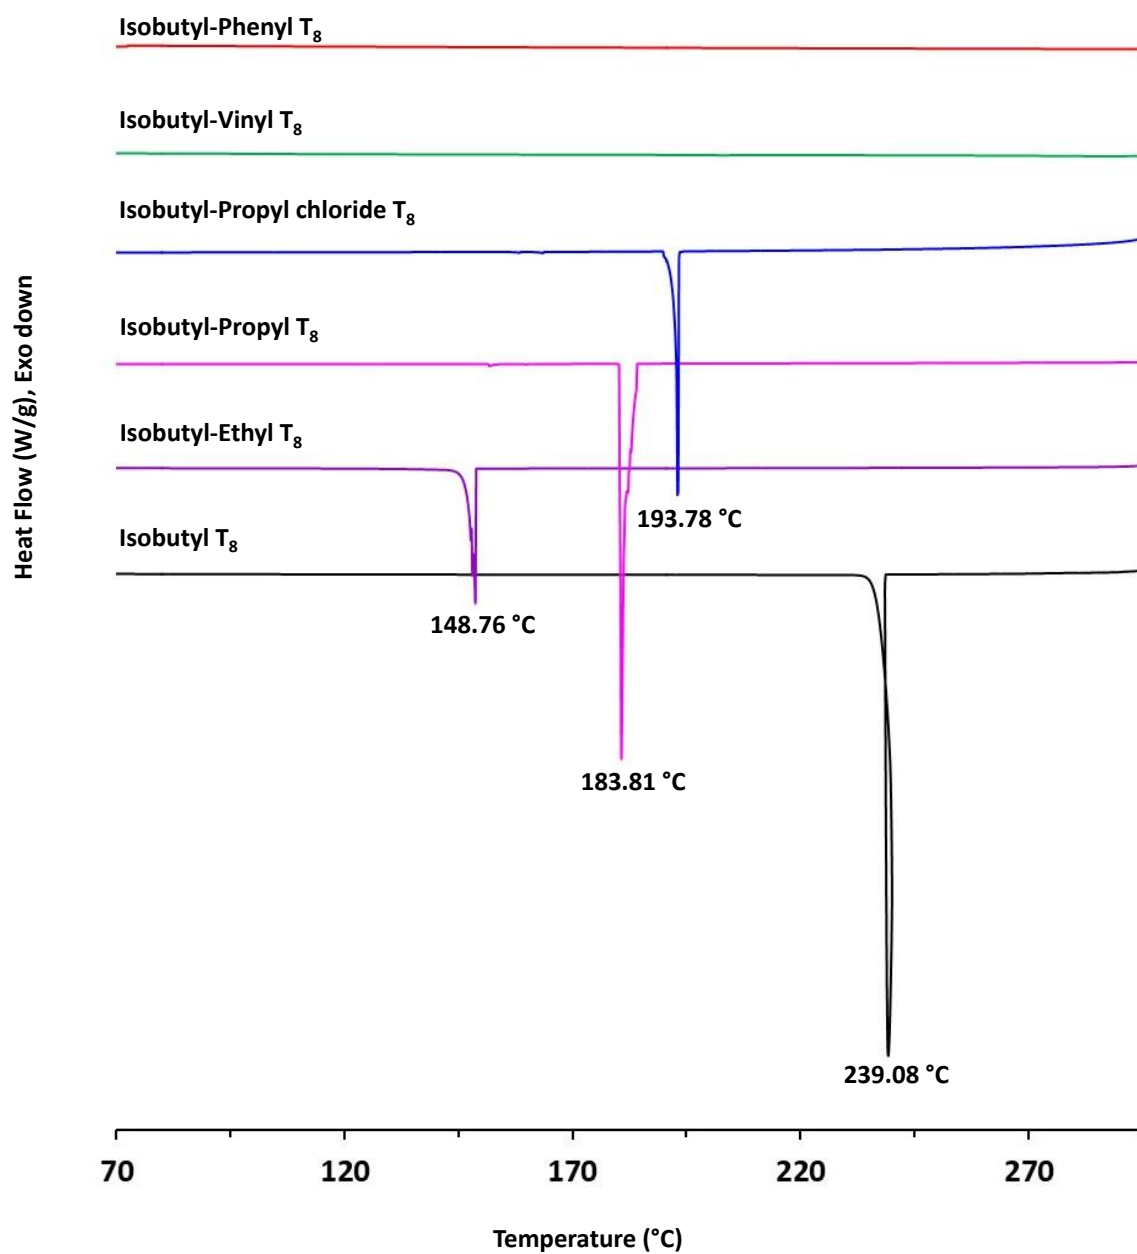

**Figure S26** DSC cooling thermograms of *i*-butyl T<sub>8</sub> and mixed-substituent T<sub>8</sub>.

# Electronic Supplementary Information (ESI)

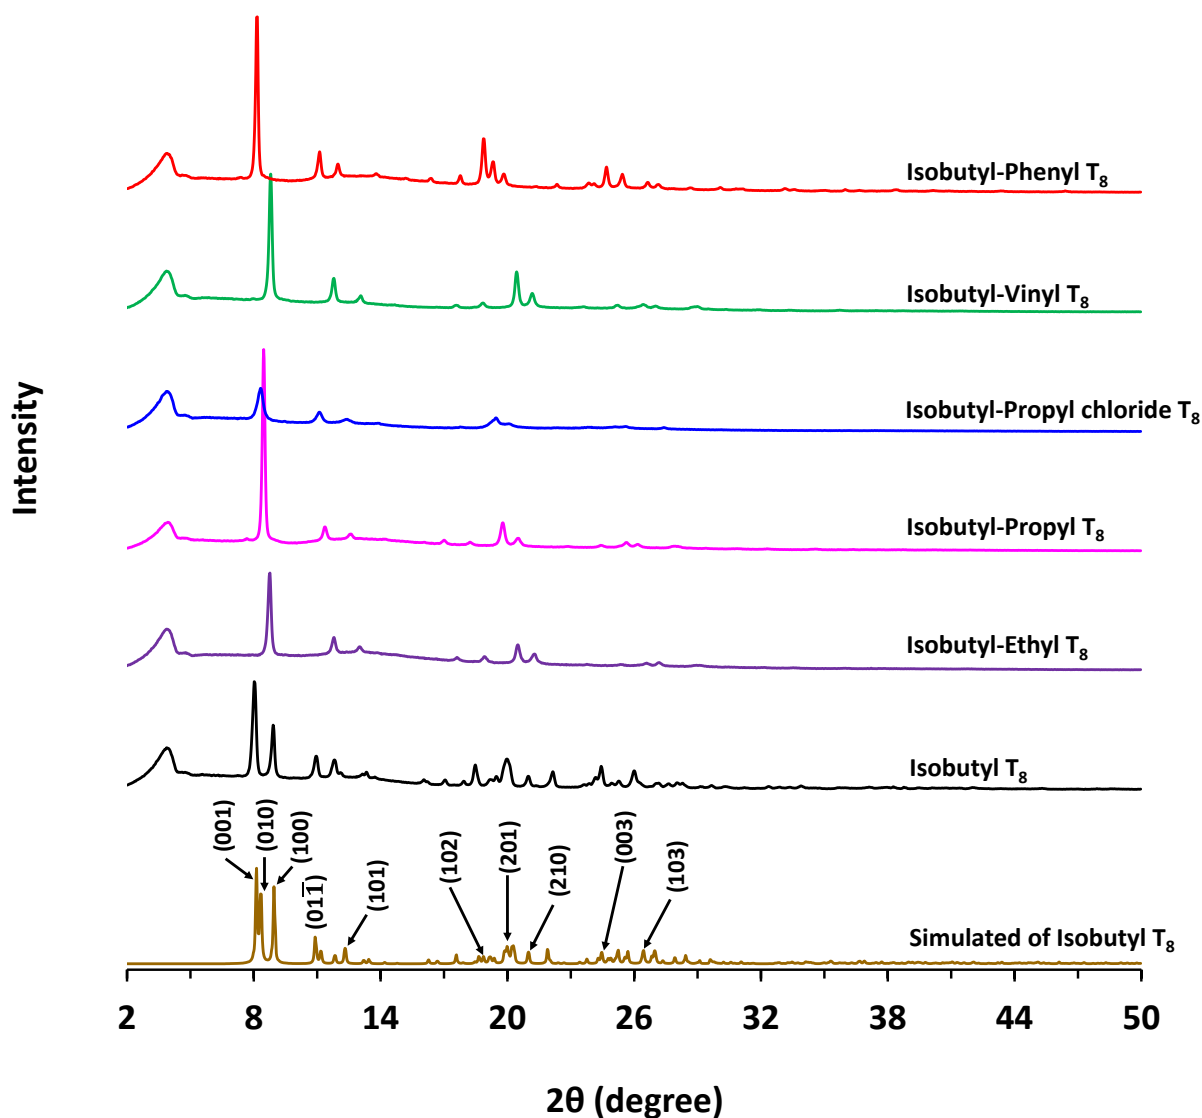

**Figure S27** XRD patterns of mixed-substituent T<sub>8</sub>, *i*-butyl T<sub>8</sub>, and simulated of *i*-butyl T<sub>8</sub>. [1]

## Reference

[1] N. Prigyai, S. Chanmungkalakul, V. Ervithayasuporn, N. Yodsini, S. Jungstittiwong, N. Takeda, M. Unno, J. Boonmak, S. Kiatkamjornwong, Lithium-Templated Formation of Polyhedral Oligomeric Silsesquioxanes (POSS), *Inorg. Chem.*, 58 (2019) 15110-15117.
